# Supplementary material for: Viromes outperform total metagenomes in revealing the spatiotemporal patterns of agricultural soil viral communities
Source: PubMed Central journal article supplement (PMC8245658; doi:10.1038/s41396-021-00897-y), 2021-02-21
Supplement: 41396_2021_897_MOESM1_ESM.pdf [file 41396_2021_897_MOESM1_ESM.pdf]

1 **Supplementary Material**

2  
3 **Supplementary Methods**

4  
5 *Soil viral DNA extraction*

6 Viral DNA was extracted from 50 g of fresh soil per sample using a previously reported protocol  
7 [1] with minor modifications. For each sample, two 50 mL conical tubes were filled with 25 g of  
8 soil and 37.5 mL of 0.02 µm filtered AKC' extraction buffer (per liter: 10% PBS, 10g K Citrate,  
9 1.44 g Na<sub>2</sub>HPO<sub>4</sub>, 0.24g KH<sub>2</sub>PO<sub>4</sub>, and 36.97g MgSO<sub>4</sub>). Resulting slurries were vortexed briefly  
10 until homogenized, shaken on an orbital shaker for 15 minutes at 400 RPM, vortexed for 3  
11 minutes, and centrifuged at 4,700 x g for 15 minutes. Supernatant was filtered through a 0.22 µm  
12 filter to remove most cells, and supernatants from tubes corresponding to the same sample were  
13 combined into one 70 mL polycarbonate ultracentrifuge tube. Supernatants were centrifuged  
14 using an Optima LE-80K ultracentrifuge (Beckman-Coulter Life Sciences, Indianapolis, IN, USA)  
15 with a 45 Ti rotor at 32,000 x g for 3 hours at 4 °C.

16 Supernatant was decanted and the resulting pellets (the viral fraction), were resuspended in 200  
17 µl of ultrapure water. Free DNA was removed from the resuspended pellets by treatment with 30  
18 units of RQ1 RNase-free DNase and 30 µl of 10X DNase buffer (Promega Corp., Madison, WI,  
19 USA) for two hours at room temperature (22 °C). The reaction was quenched with 30 µl of DNase  
20 stop solution (Promega Corp., Madison, WI, USA).

21 DNA was extracted from the viral fraction using the DNeasy PowerSoil kit (Qiagen, Hilden,  
22 Germany), following the manufacturer's protocol, except the bead-beating step was replaced by  
23 a 10-minute 70 °C incubation, a 5-second vortex, and a 5-minute 70 °C incubation. Extracted  
24 DNA was quantified by an Invitrogen Qubit 4 Fluorometer using a 1x High Sensitivity DNA assay  
25 (Thermo Fisher Scientific, Inc., Waltham, MA, USA).

27 *Soil total DNA extraction*

28 Total DNA from soil was extracted from 0.5 g of soil using the DNeasy PowerSoil kit (Qiagen,  
29 Hilden, Germany), following the manufacturer's instructions. Extracted DNA was quantified by an  
30 Invitrogen Qubit 4 Fluorometer using a 1x High Sensitivity DNA assay (Thermo Fisher Scientific,  
31 Inc., Waltham, MA, USA).

32

33 *Read processing and assembly*

34 Trimmomatic [2] was used to remove library adapters and quality-trim raw reads (minimum q-  
35 score of 30 evaluated on 4-base sliding windows; minimum read length of 50). BBDuk [3] was  
36 then used to remove PhiX sequences. *De novo* assembly on individual libraries was performed  
37 with MEGAHIT [4] in meta-large mode with a contig cutoff size of 2,000 bp. Assembly statistics  
38 were generated using the BBTools stats.sh script [3]. To remove redundant contigs across  
39 assemblies, we used the PSI-CD-HIT [5] implementation of BLASTN to cluster contigs at a global  
40 identity threshold of 0.95.

41

42 *Detection and classification of viral contigs*

43 We used VirSorter [6] and DeepVirFinder [7] to identify putative viral contigs. For VirSorter, only  
44 contigs assigned to categories with the most confident (categories 1 and 4) or likely (categories  
45 2 and 5) predictions were retained; for DeepVirFinder, only sequences with a score  $\geq 0.9$  and p-  
46 value  $< 0.05$  were retained. The union of contigs identified by both methods was used for  
47 downstream analyses. Viral contig identification was first performed on individual assemblies to  
48 measure the enrichment of viral signal in the set of contigs found in each library. Viral contig  
49 identification was also performed on the subset of clustered contigs with lengths  $\geq 10$  Kbp to  
50 generate a database of non-redundant sequences representing viral operational taxonomic units  
51 (vOTUs). The length threshold and 95% sequence identity from prior clustering were based on  
52 previous benchmarking and definitions of vOTUs [8, 9].

53 To assign taxonomic classifications to the recovered vOTUs, we first predicted protein content  
54 using Prodigal in metagenome mode [10]. The generated amino acid file was then used to build  
55 a gene-sharing network using vConTACT2[11] with the following parameters: NCBI RefSeq  
56 database of bacterial and archaeal viral genomes (v85) was used as a reference, Diamond [12]  
57 was used to calculate protein alignment, and MCL [13] and ClusterOne [14] algorithms were used  
58 to calculate protein and genome clusters, respectively.

59

#### 60 *Read mapping*

61 Read mapping against the database of non-redundant vOTUs was performed with BMap [3] at  
62 a minimum sequence identity of 90%. Resulting SAM files were converted to BAM files and  
63 indexed using SAMtools [15]. The parse function of BamM [16] was then used to generate two  
64 vOTU tables: one displaying the trimmed pileup coverage (tpmean mode) and the other one  
65 displaying the absolute number of mapped reads (counts mode). Finally, we calculated the per-  
66 sample horizontal coverage for each vOTU using the genomecov function in BEDtools [17]. We  
67 then identified instances in which vOTUs displayed < 75% coverage over the length of the contig  
68 and filtered them out of the vOTU tables using an in-house R script  
69 ([github.com/cmsantosm/SpatioTemporalViromes/blob/master/Processing/Scripts/votu\\_filtering.  
70 Rmd](https://github.com/cmsantosm/SpatioTemporalViromes/blob/master/Processing/Scripts/votu_filtering.Rmd))

71

#### 72 *Detection and classification of 16S rRNA gene fragments*

73 Reads containing 16S rRNA gene sequences were recovered using SortMeRNA [18] by  
74 comparing quality-filtered reads against representative versions of the bacterial and archaeal  
75 SILVA databases [19]. The RDP classifier [20] was then used to assign taxonomy. The output  
76 hierarchical file was further parsed using the hier2phyloseq function implemented in the RDPutils  
77 package [21] to generate a count table.

78

79 *K-mer profiling*

80 Sourmash [22, 23] was used to compute k-mer signatures for each library using a compression  
81 ratio of 1,000 and k-mer size of 31.

82

83 *Data analysis and visualization*

84 All statistical analyses were conducted using R version 3.6.3. Unless otherwise stated, analyses  
85 were performed using the trimmed pileup coverage vOTU table. The vegan package [24] was  
86 used for the following analyses: accumulation curves were calculated using the specaccum  
87 function, Bray-Curtis dissimilarity matrices were calculated on Hellinger-transformed relative  
88 abundances using the vegdist function, permutational multivariate analyses of variance  
89 (PERMANOVA) were performed with the adonis function, and Mantel tests were performed with  
90 the mantel function. We performed two sets of PERMANOVA: one set testing the individual effects  
91 of single factors (**STable 4**) and another set testing the effect of either biochar or nitrogen  
92 treatments while accounting for differences due to collection time point and/or spatial structuring  
93 along the W-E gradient (**STable 5**). In the PERMANOVA models, W-E and S-N positions were  
94 coded as continuous variables. The function pcoa from the package ape [25] was used to perform  
95 principal coordinate analyses. Hierarchical clustering on z-transformed values was performed  
96 with the hclust function. Differential abundance analyses were performed with DESeq2 [26] using  
97 count tables as input. The factors included in the design formula were those that showed a  
98 significant effect in the overall composition analyses: collection time point, W-E gradient, and  
99 biochar treatment to model vOTU abundances; and collection time point to model 16S OTU  
100 abundances. All plots were generated with the ggplot2 [27], ggdendro [28], GGally [29], and  
101 eulerr [30] packages. All scripts and intermediate files are available at  
102 [github.com/cmsantosm/SpatioTemporalViromes/](https://github.com/cmsantosm/SpatioTemporalViromes/)

103

104

**References**

105

- 106 1. Trubl G, Solonenko N, Chittick L, Solonenko SA, Rich VI, Sullivan MB. Optimization of viral  
107 resuspension methods for carbon-rich soils along a permafrost thaw gradient. *PeerJ* 2016;  
108 **4**: e1999.
- 109 2. Bolger AM, Lohse M, Usadel B. Trimmomatic: a flexible trimmer for Illumina sequence  
110 data. *Bioinformatics* 2014; **30**: 2114–2120.
- 111 3. Bushnell B. BBTools software package. URL <http://sourceforge.net/projects/bbmap> 2014.
- 112 4. Li D, Liu C-M, Luo R, Sadakane K, Lam T-W. MEGAHIT: an ultra-fast single-node solution  
113 for large and complex metagenomics assembly via succinct de Bruijn graph. *Bioinformatics*  
114 2015; **31**: 1674–1676.
- 115 5. Huang Y, Niu B, Gao Y, Fu L, Li W. CD-HIT Suite: a web server for clustering and  
116 comparing biological sequences. *Bioinformatics* 2010; **26**: 680–682.
- 117 6. Roux S, Enault F, Hurwitz BL, Sullivan MB. VirSorter: mining viral signal from microbial  
118 genomic data. *PeerJ* 2015; **3**: e985.
- 119 7. Ren J, Song K, Deng C, Ahlgren NA, Fuhrman JA, Li Y, et al. Identifying viruses from  
120 metagenomic data using deep learning. *Quantitative Biology* 2020; **8**: 64–77.
- 121 8. Roux S, Emerson JB, Eloë-Fadrosh EA, Sullivan MB. Benchmarking viromics: an in silico  
122 evaluation of metagenome-enabled estimates of viral community composition and diversity.  
123 *PeerJ* 2017; **5**: e3817.
- 124 9. Roux S, Adriaenssens EM, Dutilh BE, Koonin EV, Kropinski AM, Krupovic M, et al.  
125 Minimum Information about an Uncultivated Virus Genome (MIUViG). *Nat Biotechnol* 2019;  
126 **37**: 29–37.
- 127 10. Hyatt D, Chen G-L, Locascio PF, Land ML, Larimer FW, Hauser LJ. Prodigal: prokaryotic  
128 gene recognition and translation initiation site identification. *BMC Bioinformatics* 2010; **11**:  
129 119.

- 130 11. Bin Jang H, Bolduc B, Zablocki O, Kuhn JH, Roux S, Adriaenssens EM, et al. Taxonomic  
131 assignment of uncultivated prokaryotic virus genomes is enabled by gene-sharing  
132 networks. *Nat Biotechnol* 2019; **37**: 632–639.
- 133 12. Buchfink B, Xie C, Huson DH. Fast and sensitive protein alignment using DIAMOND. *Nat*  
134 *Methods* 2015; **12**: 59–60.
- 135 13. van Dongen SM. Graph clustering by flow simulation. 2000.
- 136 14. Nepusz T, Yu H, Paccanaro A. Detecting overlapping protein complexes in protein-protein  
137 interaction networks. *Nat Methods* 2012; **9**: 471–472.
- 138 15. Li H, Handsaker B, Wysoker A, Fennell T, Ruan J, Homer N, et al. The Sequence  
139 Alignment/Map format and SAMtools. *Bioinformatics* 2009; **25**: 2078–2079.
- 140 16. Woodcroft B, Lamberton T, Imelfort M. BamM. 2018.
- 141 17. Quinlan AR, Hall IM. BEDTools: a flexible suite of utilities for comparing genomic features.  
142 *Bioinformatics* 2010; **26**: 841–842.
- 143 18. Kopylova E, Noé L, Touzet H. SortMeRNA: fast and accurate filtering of ribosomal RNAs in  
144 metatranscriptomic data. *Bioinformatics* 2012; **28**: 3211–3217.
- 145 19. Quast C, Pruesse E, Yilmaz P, Gerken J, Schweer T, Yarza P, et al. The SILVA ribosomal  
146 RNA gene database project: improved data processing and web-based tools. *Nucleic Acids*  
147 *Res* 2013; **41**: D590–6.
- 148 20. Wang Q, Garrity GM, Tiedje JM, Cole JR. Naive Bayesian classifier for rapid assignment of  
149 rRNA sequences into the new bacterial taxonomy. *Appl Environ Microbiol* 2007; **73**: 5261–  
150 5267.
- 151 21. Quensen J. RDPutils: R Utilities for Processing RDPTool Output. 2018.
- 152 22. Pierce NT, Irber L, Reiter T, Brooks P, Brown CT. Large-scale sequence comparisons with  
153 *sourmash*. *F1000Res* 2019; **8**: 1006.
- 154 23. Titus Brown C, Irber L. sourmash: a library for MinHash sketching of DNA. *JOSS* 2016; **1**:  
155 27.

- 156 24. Oksanen J, Blanchet FG, Friendly M, Kindt R, Legendre P, McGlenn D, et al. vegan:  
157 Community Ecology Package. 2018.
- 158 25. Paradis E, Claude J, Strimmer K. APE: Analyses of Phylogenetics and Evolution in R  
159 language. *Bioinformatics* 2004; **20**: 289–290.
- 160 26. Love MI, Huber W, Anders S. Moderated estimation of fold change and dispersion for  
161 RNA-seq data with DESeq2. *Genome Biol* 2014; **15**: 550.
- 162 27. Wickham H. ggplot2: Elegant Graphics for Data Analysis. 2016. Springer-Verlag New York.
- 163 28. de Vries A, Ripley BD. ggdendro: Create Dendrograms and Tree Diagrams Using 'ggplot2'.  
164 2016.
- 165 29. Schloerke B, Crowley J, Cook D, Briatte F, Marbach M, Thoen E, et al. GGally: Extension  
166 to 'ggplot2'. 2018.
- 167 30. Larsson J. eulerr: Area-Proportional Euler and Venn Diagrams with Ellipses. 2020.

168

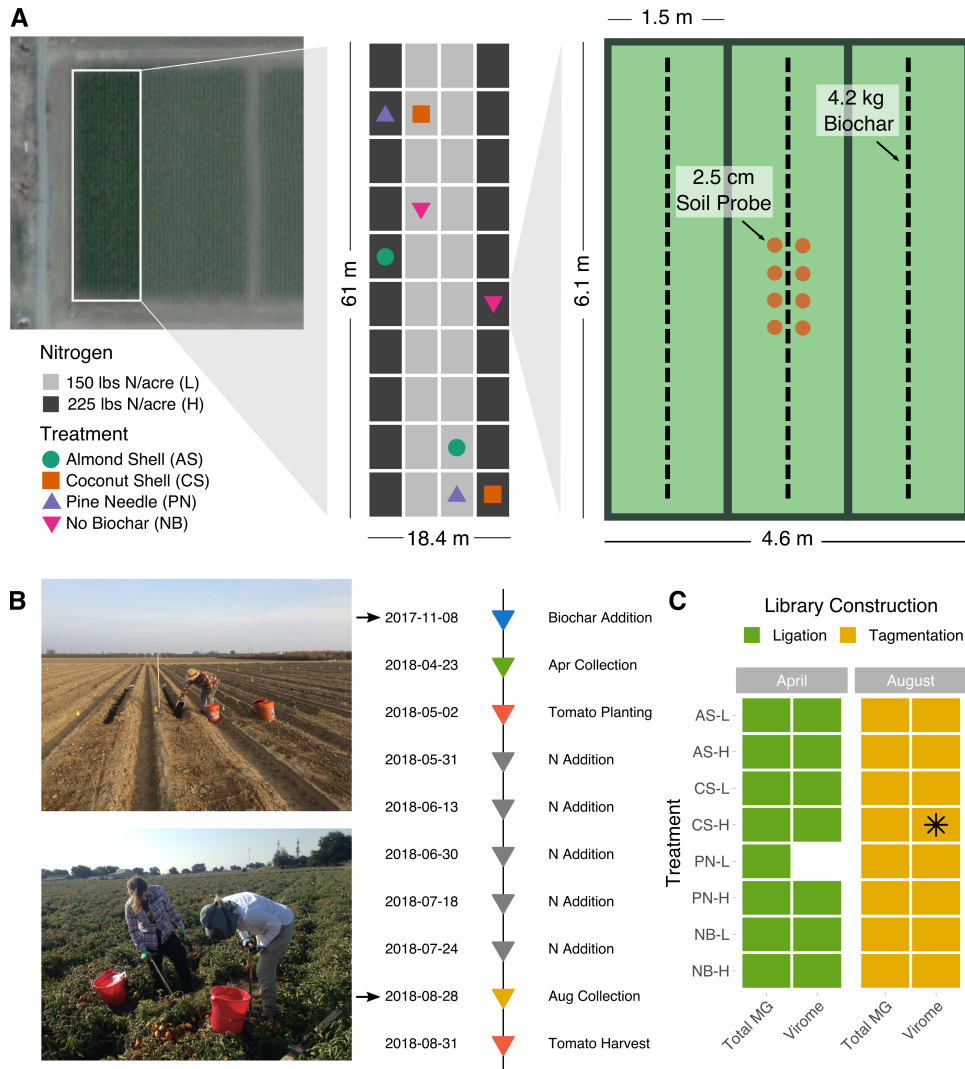

169

170 **Supplementary Figure 1**

171 (A) Left panel: aerial view of the agricultural field; the highlighted area indicates the experimental  
 172 block used for this study. Picture was taken on July 10th, 2018, in the middle of the tomato growing  
 173 season (see B). Middle panel: diagram depicting the spatial distribution of plots within the block:  
 174 dots indicate the eight sampled plots with color and shape corresponding to the biochar treatment;  
 175 nitrogen fertilization treatment is indicated by the color of the individual plots (low - light gray,  
 176 high - dark gray). Fertilization began between the two collection time points (see B). Right panel:  
 177 diagram depicting an individual plot. Dotted black lines represent the approximate area where  
 178 biochar was buried along each bed. Brown dots indicate the approximate location of the eight soil  
 179 cores harvested for each sample. (B) Pictures on the left show how biochar additions (up) and  
 180 August sample collection (down) were performed. Right: timeline of the growing season, biochar  
 181 and nitrogen amendments, and collection time points. Note that the distance between time points  
 182 is not to scale. (C) Library construction workflows used to generate the total metagenomes (MG)  
 183 and viromes. The blank space represents a virome sample that failed at the library construction  
 184 step, and the asterisk highlights the virome sample omitted from compositional analyses due to  
 185 suboptimal sequencing throughput and read mapping (see Figures 1A and D and Supplementary  
 186 Figure 3).



187  
188

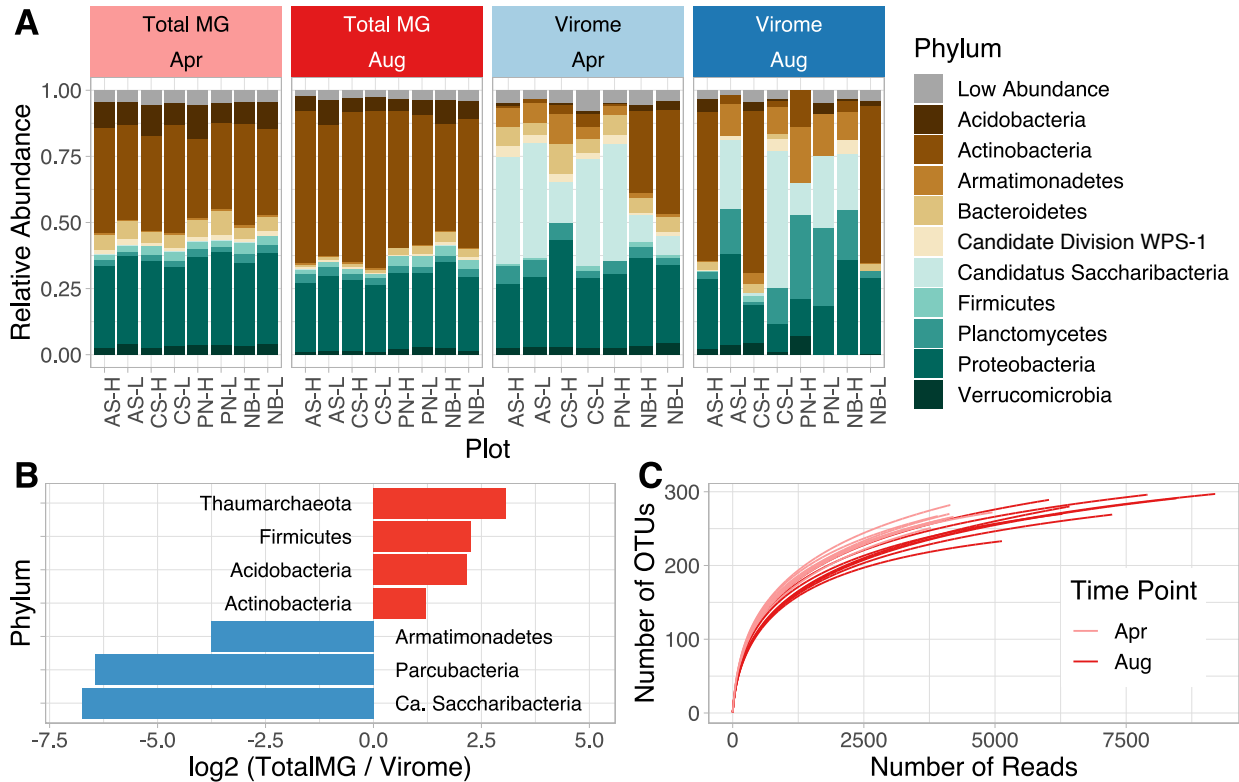

189  
190

### Supplementary Figure 2

191 (A) Relative abundances of microbial phyla in each library, based on recovered 16S rRNA gene  
192 fragments with an assigned taxonomy. Only the top 10 most abundant phyla are shown. “Low  
193 abundance” represents the summed relative abundances of all OTUs not assigned to the 10 most  
194 abundant phyla. (B) Microbial phyla with significantly different relative abundances between total  
195 metagenomes (MGs) and viromes (adjusted  $P < 0.05$ ; paired Wilcoxon test). Red and blue bars  
196 indicate phyla significantly enriched in total metagenomes and viromes, respectively. Higher  
197 values along the x-axis indicate more significant enrichment. (C) Rarefaction curves of 16S rRNA  
198 gene OTU profiles derived from total metagenomes. Each line represents one metagenome.

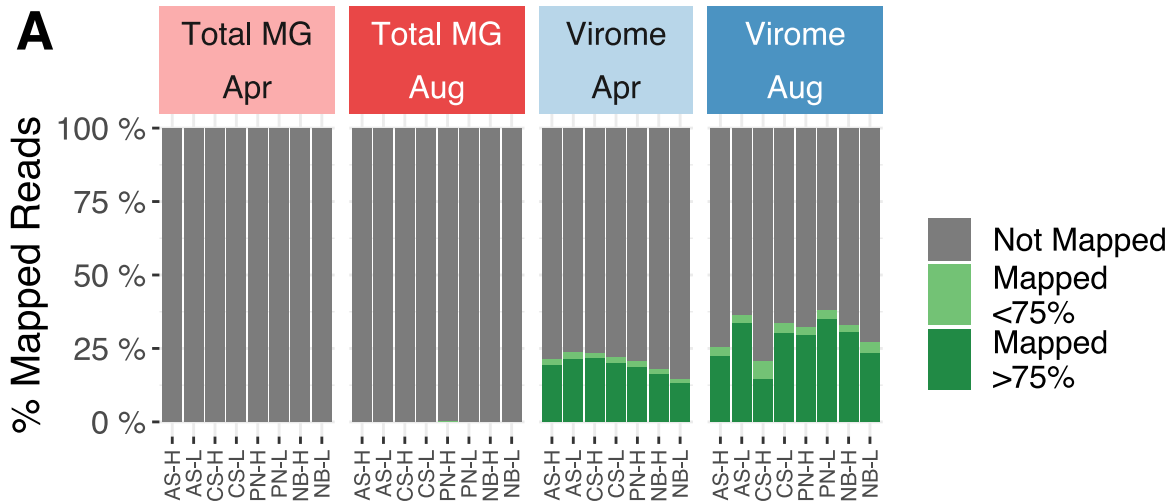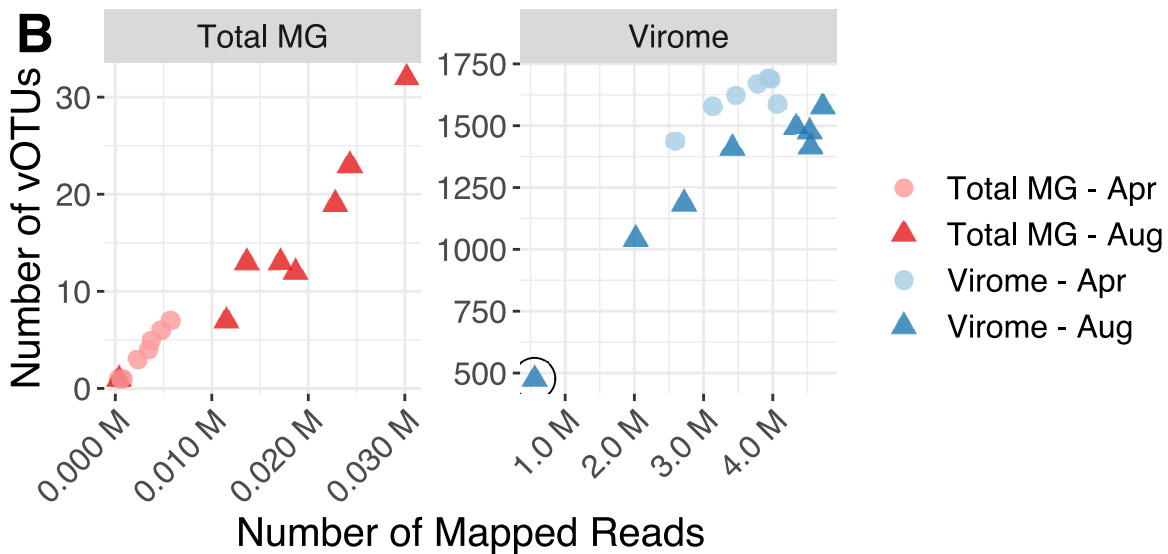

199

200

**Supplementary Figure 3**

201

(A) Percent of high-quality reads mapped to the set of vOTU contigs identified in our dataset.

202

Green colors highlight read mapping below (light green) or above (dark green) the threshold of

203

75% coverage over the length of the vOTU sequence required for detection. (B) Distribution of

204

the total number of reads mapped to vOTUs (x-axis) and the total number of vOTUs detected in

205

each sample (y-axis). Note different y-axis maxima between graphs. The circled virome sample

206

performed suboptimally (>2 standard deviations below the mean number of mapped reads and

207

mean richness across viromes) and was therefore discarded for downstream compositional

208

analyses. Total MG = total metagenome.

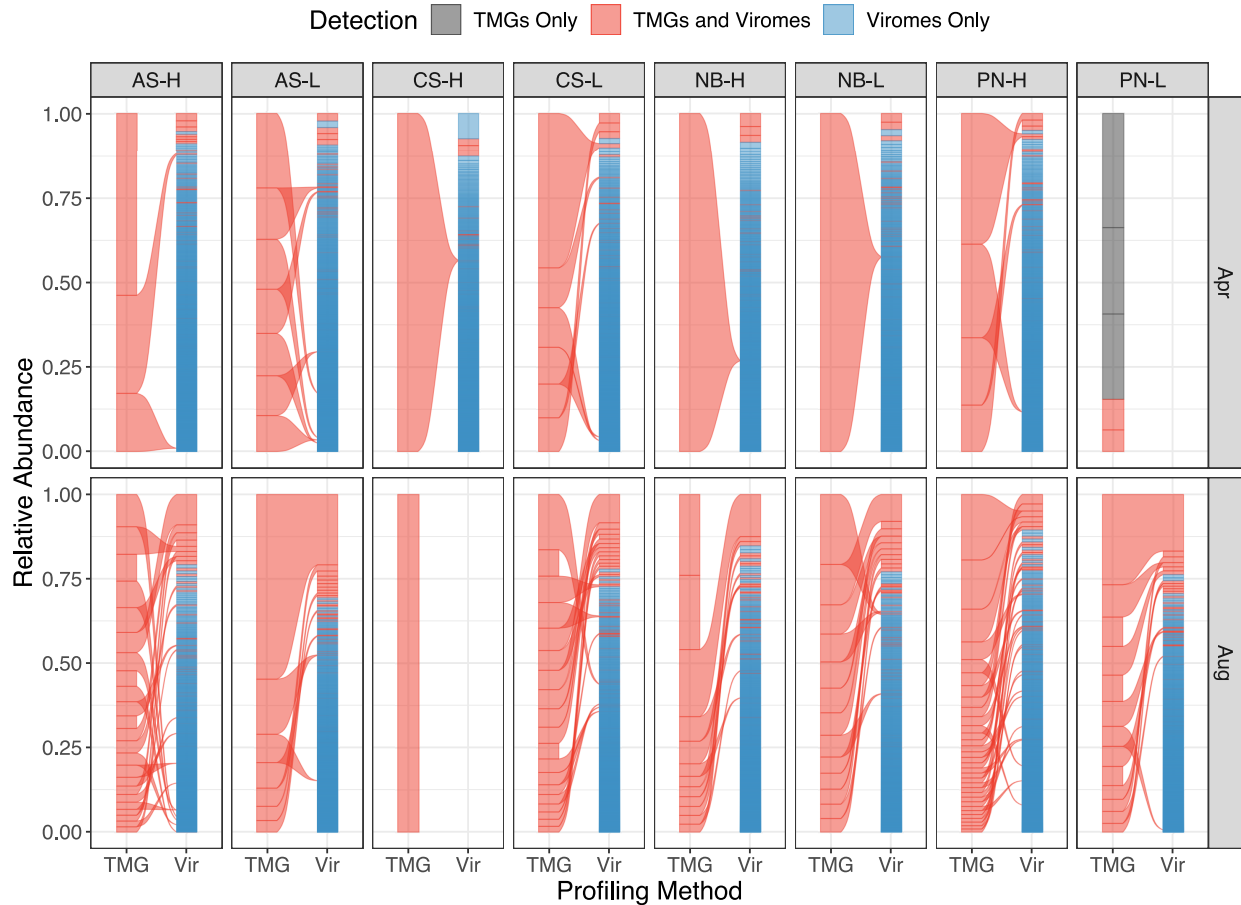

209  
210  
211  
212  
213  
214  
215  
216  
217  
218

**Supplementary Figure 4**

Ranked relative abundances of individual vOTUs across profiling methods. Facets display individual sets of paired total metagenomes (TMGs) and viromes (Vir) derived from the same soil sample. The position of each vOTU along the y-axis indicates its rank within a profile, and a link between two profiles indicates that the particular vOTU was found in both the total metagenome and the virome from the same sample. Color denotes the detection category for each vOTU, considering all viromes and total metagenomes (as in the Euler diagram in Figure 2C): blue indicates vOTUs exclusively detected in viromes, gray indicates vOTUs exclusively detected in total metagenomes, and red indicates vOTUs found in both datasets.

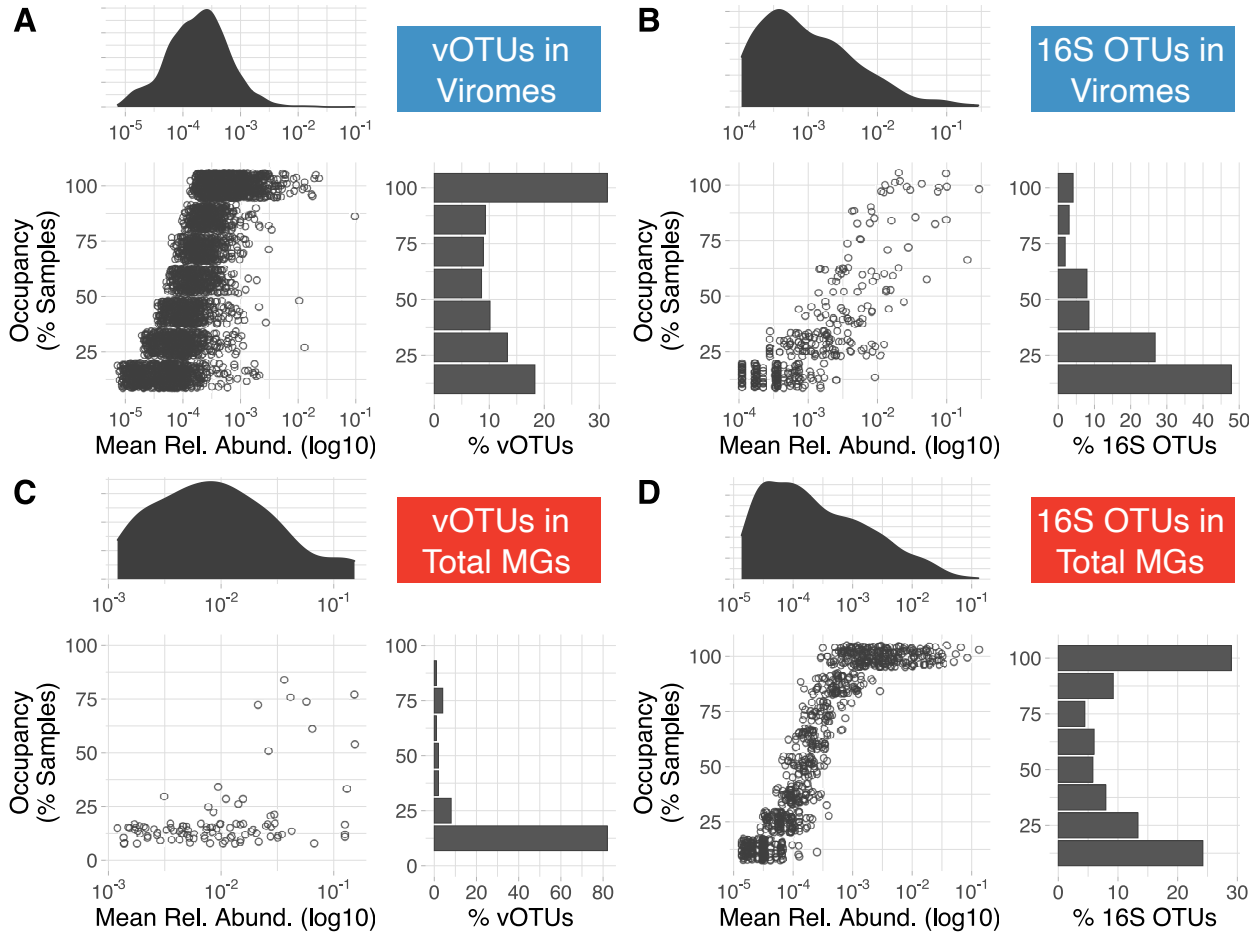

219  
 220  
 221  
 222  
 223  
 224  
 225  
 226  
 227  
 228

**Supplementary Figure 5**

Abundance-occupancy curves of vOTUs in viromes (A), 16S OTUs in viromes (B), vOTUs in total metagenomes (MGs) (C), and 16S rRNA gene OTUs in total metagenomes (D). In all panels, the bottom left scatter plots represent the mean relative abundance (x-axis) and occupancy (percent of samples in which a given vOTU was detected, y-axis) that individual vOTUs or 16S OTUs displayed within a collection time point (April or August). Thus, vOTUs or 16S OTUs detected in both time points are represented twice. The top left density curves show the distribution of relative abundances for all vOTUs or 16S OTUs. The bottom right bar plots display the percent of vOTUs or 16S OTUs (x-axis) found at each occupancy level (y-axis).

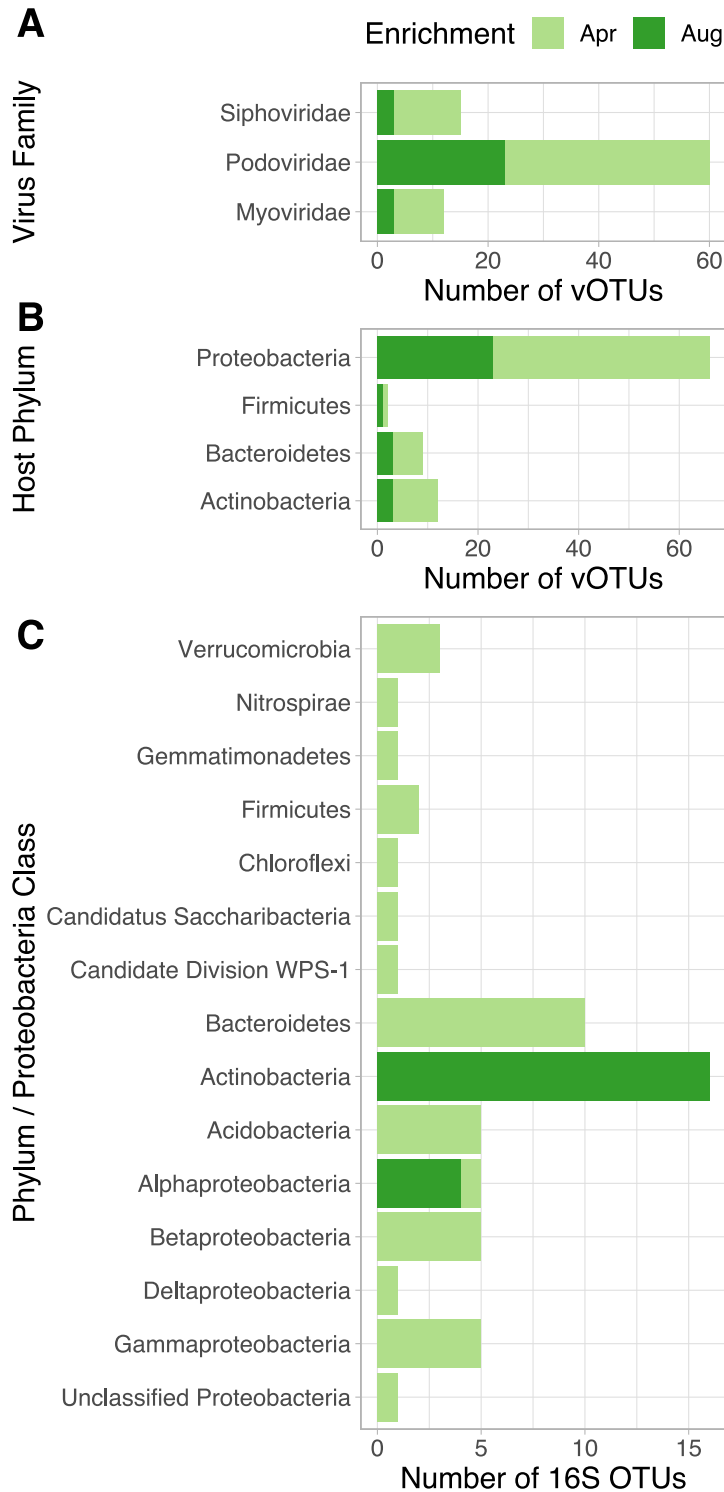

229

230

**Supplementary Figure 6**

231 (A) Virus family and (B) predicted host phylum of vOTUs that were significantly enriched according

232 to collection time point and that could be taxonomically classified (n = 92 vOTUs) (**Fig 3**). (C)

233 Phylum or Proteobacteria class of the 16S rRNA gene OTUs that were significantly differentially

234 abundant between collection time points. In all plots, color indicates the collection time point in

235 which vOTUs or 16S rRNA gene OTUs were enriched.

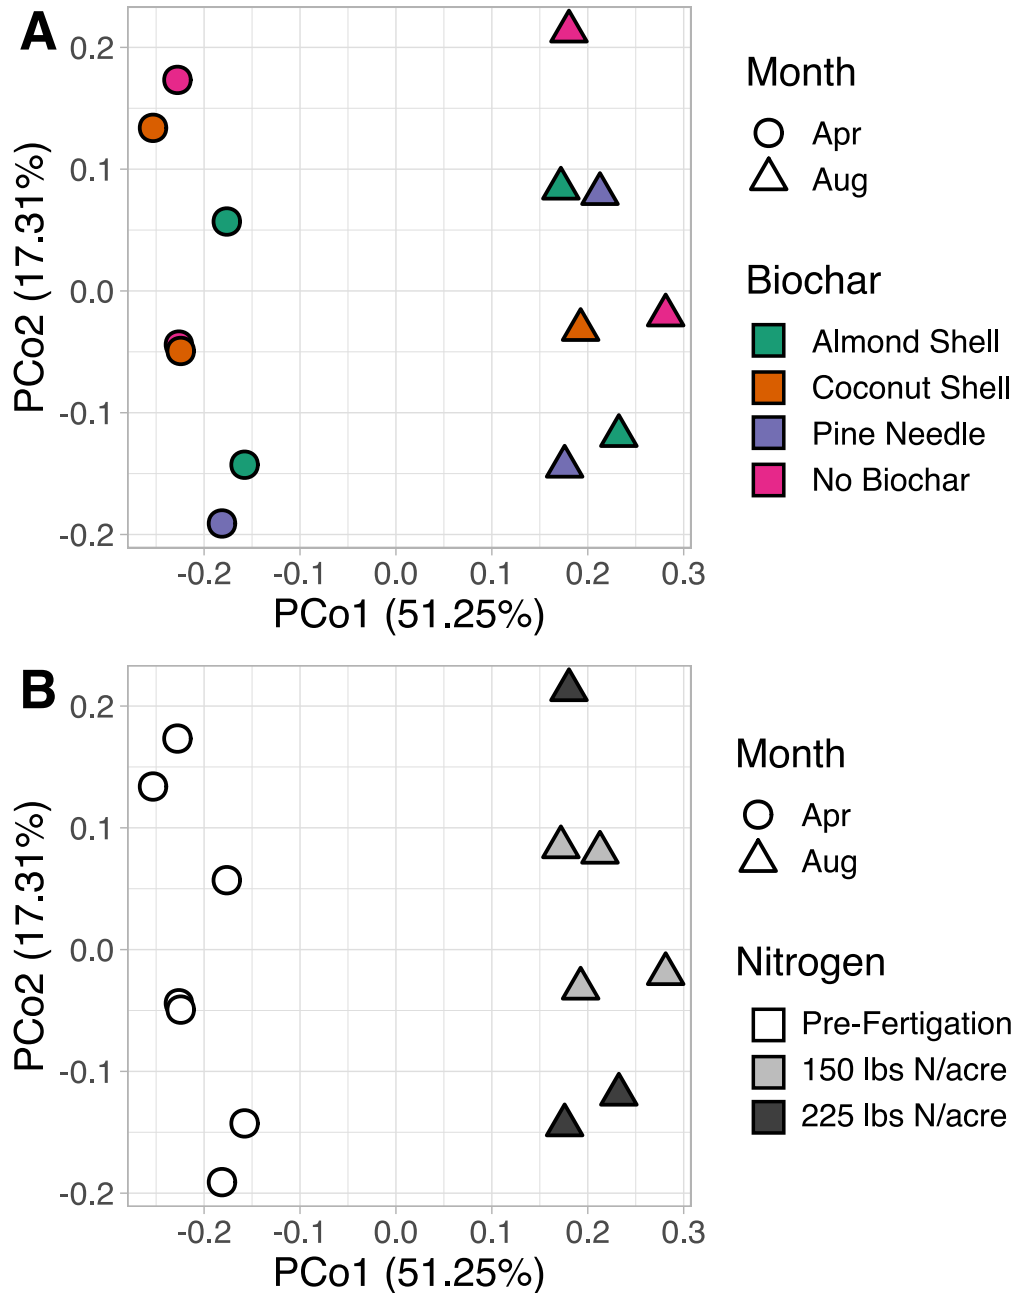

236  
237  
238  
239  
240  
241  
242

**Supplementary Figure 7.**

Unconstrained analysis of principal coordinates based on vOTU Bray-Curtis dissimilarities calculated on Hellinger-transformed relative abundances across virome samples. Shapes represent the collection time point, and colors indicate (A) biochar treatment or (B) nitrogen fertilization treatment (note that April samples were collected before any nitrogen was added to the field)

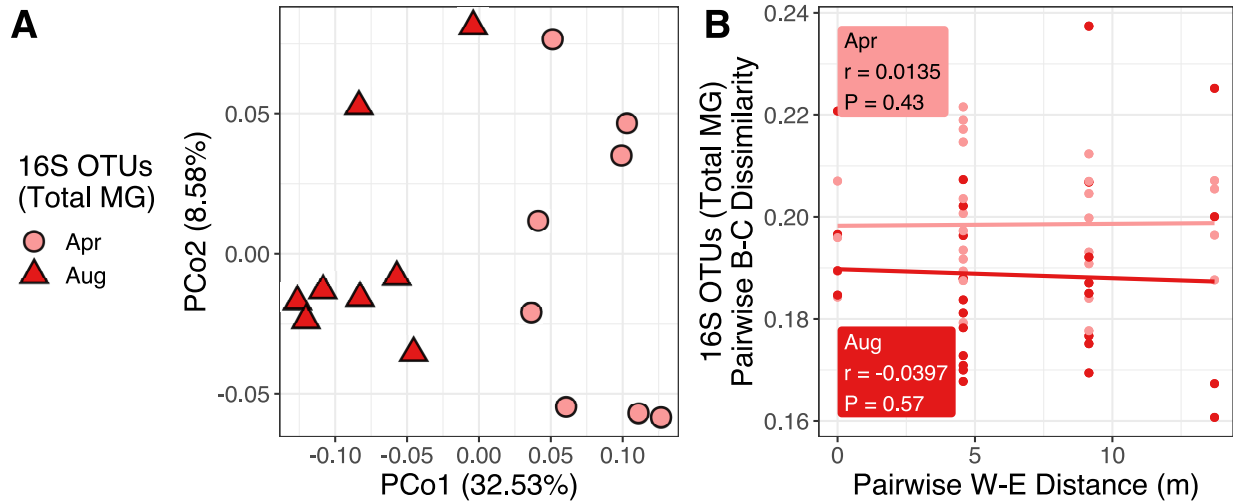

243  
244  
245  
246  
247  
248  
249  
250  
251

**Supplementary Figure 8.**

(A) Unconstrained analyses of principal coordinates based on Bray-Curtis (B-C) dissimilarities calculated on Hellinger-transformed relative abundances across 16S rRNA gene OTU profiles derived from total metagenomes (MGs). (B) Correlation between spatial distance across the west-east axis (in meters between plots) and Bray-Curtis dissimilarities calculated across 16S rRNA gene OTU profiles derived from total metagenomes. Inset values display the Mantel  $r$  statistic and associated  $P$ -value. Bray-Curtis dissimilarities were calculated on Hellinger-transformed relative abundances.

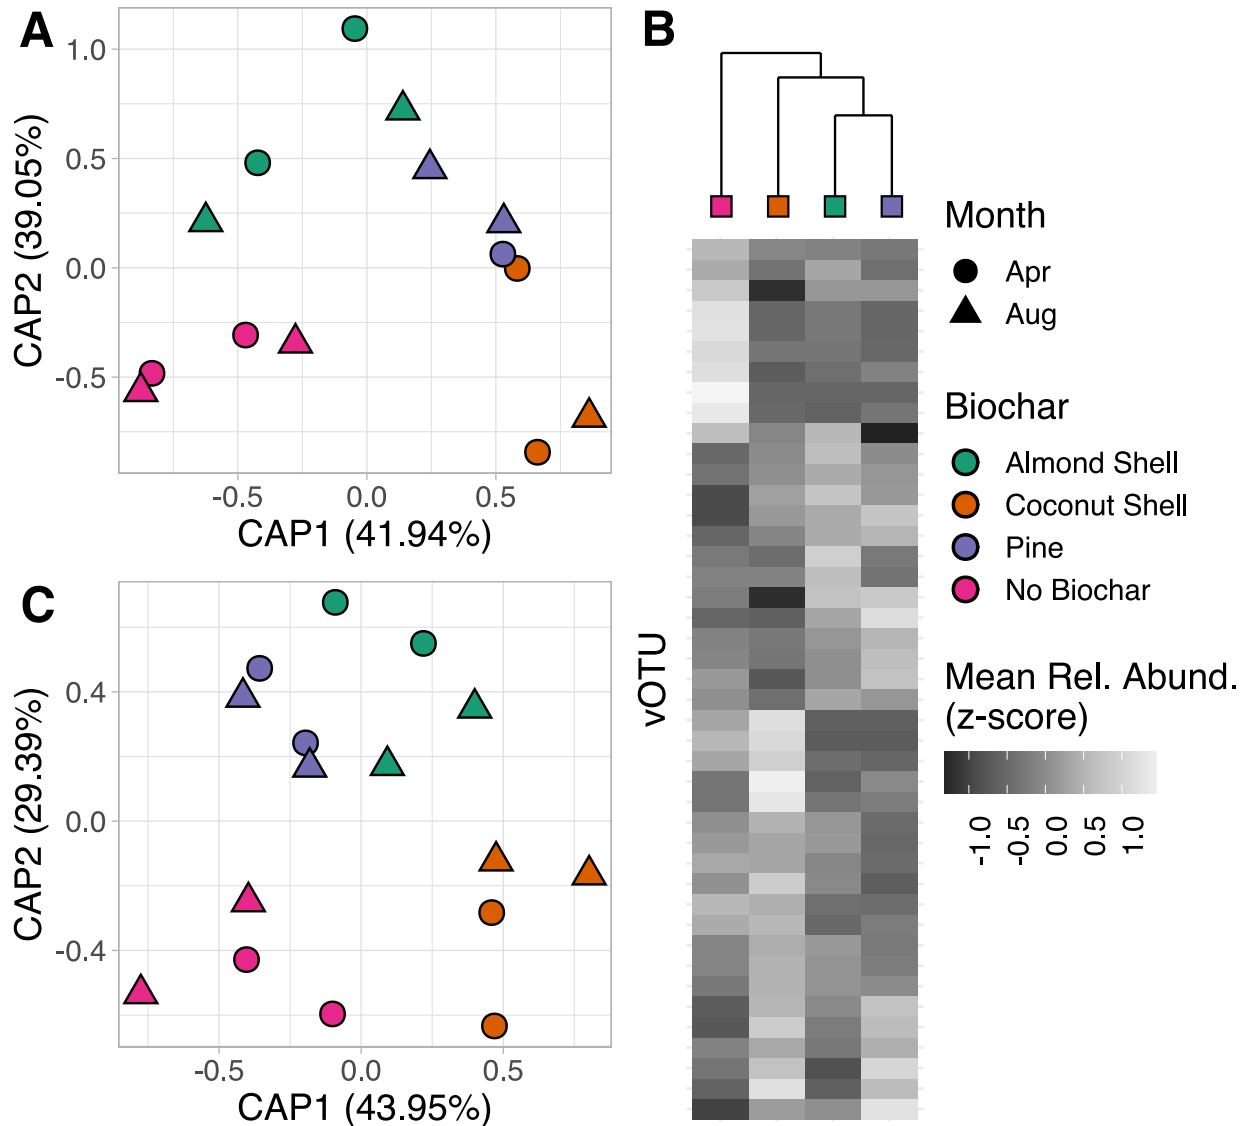

252  
253  
254  
255  
256  
257  
258  
259  
260  
261  
262  
263  
264

**Supplementary Figure 9.**

(A) Partial canonical analysis of principal coordinates (CAP) performed on Bray-Curtis dissimilarities calculated on vOTU profiles from viromes. The effects of collection time point and W-E position were removed. Colors indicate biochar treatment, and shape indicates sampling time point (legends are to the right of panel B). (B) Hierarchical clustering of biochar treatments based on the relative abundances of vOTUs significantly affected by biochar amendments. The heatmap shows the mean relative abundance (z-transformed) of each vOTU (rows) across biochar treatments (columns). (C) Partial CAP performed on Bray-Curtis dissimilarities calculated on 16S rRNA gene OTU profiles from total metagenomes. For A and B, Bray-Curtis dissimilarities were calculated on Hellinger-transformed relative abundances. The effect of collection time point was removed.



265  
266  
267  
268  
269  
270  
271  
272  
273  
274  
275  
276  
277  
278  
279  
280  
281  
282  
283  
284  
285  
286  
287  
288  
289  
290  
291  
292  
293  
294  
295  
296  
297  
298  
299  
300  
301  
302  
303  
304  
305  
306  
307  
308  
309  
310  
311  
312  
313  
314  
315

## Supplementary Table Legends

### **Supplementary Table 1**

Properties of biochar amended to agricultural field

### **Supplementary Table 2**

Sequencing depths (before and after quality filtering) and sample metadata for all libraries reported in this study.

### **Supplementary Table 3**

Viral cluster assignment for RefSeq genomes and vOTU contigs

### **Supplementary Table 4**

Permutational multivariate analyses of variance testing the effect of individual variables on community composition. Analyses were performed on Bray-Curtis dissimilarities calculated on Hellinger-transformed relative abundances across vOTU profiles in viromes and 16S rRNA gene OTU profiles in total metagenomes (Total MG). The effect of nitrogen concentration was only tested in the August subset of samples, after the fertigation had occurred. The last column indicates the formula used to run the test.

### **Supplementary Table 5**

Permutational multivariate analyses of variance testing the effect of biochar or nitrogen treatments while controlling for the variation due to collection time point and/or W-E spatial gradient. Analyses were performed on Bray-Curtis dissimilarities calculated on Hellinger-transformed relative abundances across vOTU profiles in viromes and 16S rRNA gene OTU profiles in total metagenomes (Total MG). The effect of nitrogen concentration was only tested in the August subset of samples, after the fertigation had occurred. The last column indicates the formula used to run the test.

### **Supplementary Table 6**

Set of vOTUs differentially abundant across collection time points (Wald test, adjusted P-val < 0.05). The first 7 columns are the default output from DESeq2. Column "VC" indicates the viral cluster assigned to each vOTU by vConTACT2.

### **Supplementary Table 7**

Set of 16S rRNA gene OTUs differentially abundant across collection time points (Wald test, adjusted P-val < 0.05). The first 7 columns are the default output from DESeq2.

### **Supplementary Table 8**

ANOVA test of the effects of collection time point, biochar, nitrogen amendment concentration, W-E position, and S-N position on the measured chemical properties of soil. The effect of nitrogen amendment concentration was only tested for the August samples.

### **Supplementary Table 9**

Set of vOTUs significantly affected by plot position along the west-east axis of the sampled field (Wald test, adjusted P-val < 0.05). The first 7 columns are the default output from DESeq2. Column "VC" indicates the viral cluster assigned to each vOTU by vConTACT2.

### **Supplementary Table 10**

316 Set of vOTUs differentially abundant across biochar treatments (likelihood ratio test, adjusted P-  
317 val < 0.05). Column "VC" indicates the viral cluster assigned to each vOTU by vConTACT2.
